# Supplementary material
Source: Springer Nature journal article supplement (https://www.springermedizin.de/resource/supplementary/12916_2007_163_MOESM1_ESM.pdf/9599300)

**a**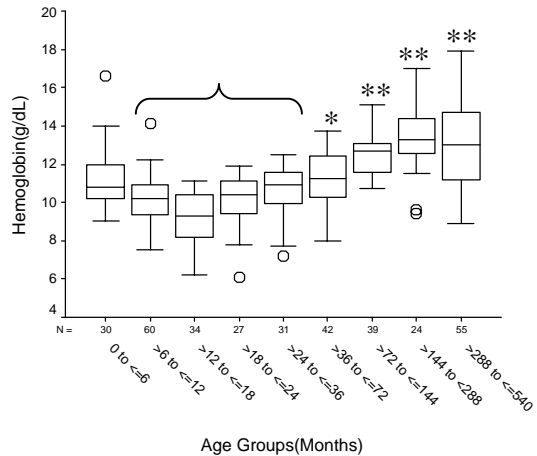

Age Groups(Months)

**b**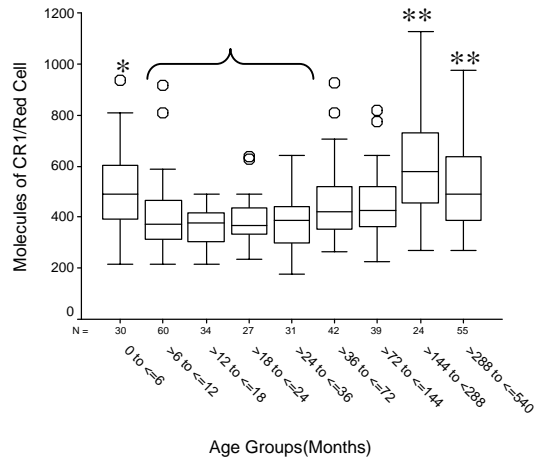

Age Groups(Months)

**c**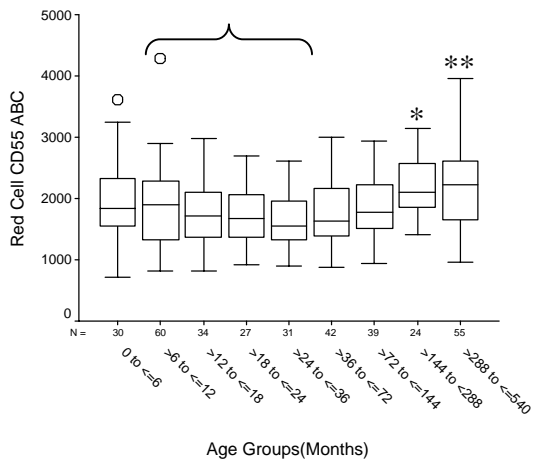

Age Groups(Months)

**d**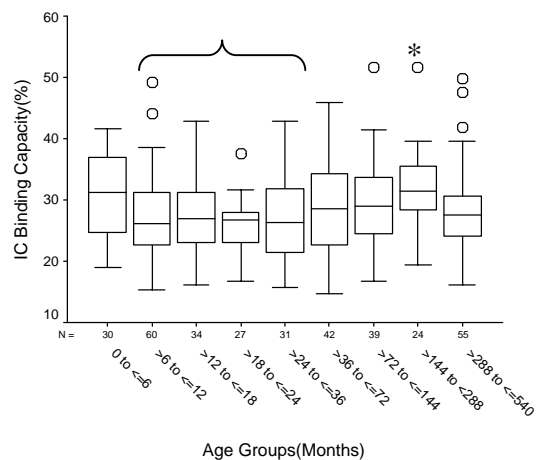

Age Groups(Months)

Supplement: MOESM1 [file 9599300]
